# Supplementary material
Source: publisher site journal article supplement (https://www.dovepress.com/article/278868)
Supplement: Supplementary file 1 [file get_supplementary_file.php]

**Appendix A:** Literature strings

Embase:

('devices'/de OR 'medical device'/de OR 'device safety'/exp OR 'device recall'/de OR (device*):ab,ti) AND ('signal detection'/exp OR 'post-marketing surveillance'/de OR 'risk management'/de OR ((signal* NEAR/3 detect*) OR ((post-market* OR post-market* OR product* OR device*) NEAR/6 (surveillan* OR regulat* OR safety)) OR ((risk OR safety) NEAR/3 management)):ab,ti) NOT ([Conference Abstract]/lim OR [Letter]/lim OR [Note]/lim OR [Editorial]/lim) AND [english]/lim

Medline Ovid:

("Equipment and Supplies"/ OR "Equipment Safety"/ OR "Medical Device Recalls"/ OR (device*).ab,ti,kf.) AND ("Product Surveillance, Post-marketing"/ OR "Risk Management"/ OR ((signal* ADJ3 detect*) OR ((post-market* OR post-market* OR product* OR device*) ADJ6 (surveillan* OR regulat* OR safety)) OR ((risk OR safety) ADJ3 management)).ab,ti,kf.) NOT (letter OR news OR comment OR editorial OR congresses OR abstracts).pt. AND english.la.

Cochrane:

((device*):ab,ti) AND (((signal* NEAR/3 detect*) OR ((post-market* OR post-market* OR product* OR device*) NEAR/6 (surveillan* OR regulat* OR safety)) OR ((risk OR safety) NEAR/3 management)):ab,ti)

Web of science:

TS=(((device* NEAR/2 medical*)) AND (((signal* NEAR/2 detect*) OR ((post-market* OR post-market* OR product* OR device*) NEAR/5 (surveillan* OR regulat* OR safety)) OR ((risk OR safety) NEAR/2 management))) )

Google scholar

"medical device|devices" "signal detection"|"post-market|market|product|device surveillance|regulat|safety"|"risk|safety management"
